# Supplementary material for: Neutrophil Extracellular Trapping Role in Cancer, Metastases, and Cancer-Related Thrombosis: a Narrative Review of the Current Evidence Base
Source: Springer Nature journal article supplement (doi:10.1007/s11912-021-01103-0), 2021-08-03
Supplement: MOESM1 [file 11912_2021_1103_MOESM1_ESM.docx]

**Supplementary material**

| Table 1S: Summary of relevant articles | | | | | |
| --- | --- | --- | --- | --- | --- |
| Author,  Title,  Journal,  Year | **Objectives** | **Design,**  **Population,**  **Sample size** | **Methodology** | **Findings** | **Strengths & Limitations** |
| Galos EV et al [62]  Neutrophil extracellular trapping and angiogenesis biomarkers after intravenous or inhalation anaesthesia with or without intravenous lidocaine for breast cancer surgery: a prospective, randomised trial.  British Journal of Anaesthesia, 2020 October | Examine the effects of 4 different anaesthetic techniques on NETs formation expression in breast cancer surgery in women. | RCT,  Women undergoing breast cancer surgery of curative intent.  N=120 | Women were randomly assigned to receive one of 4 anaesthetic techniques: sevoflurane (S), sevoflurane plus i.v. lidocaine (SL), propofol (P), and propofol plus i.v. lidocaine (PL).  Venous blood was taken before induction of anaesthesia and 20-28 hrs post-op. MPO & CitH3 concentrations were measured by enzyme-linked immunosorbent assay and represented NETosis expression. | Perioperative use of lidocaine decreased MPO concentrations (8.5 [3.4] vs 10.8 [1.8] ng ml-1, P=0.03 for SL and S and 8.6 [3.1] vs 11.6 [2.5] ng ml-1, P=0.01 for PL and P, respectively)  and citH3 concentrations as well (109 [23] vs 125 [22] ng ml-1, P=0.01 for SL and S and 98 [14] vs 130 [32] mg ml-1, P=0.007, for PL and P, respectively). | Strengths   - RCT design - Large sample size - Clear inclusion criteria and cohorts - 2 highly sensitive tests for NETosis expression used - Recent, up to date research - Blinding of the scientist conducting translational work |
| Aghamelu O et al [63]  Serum NETosis expression and recurrence risk after regional or volatile anaesthesia during breast cancer surgery: A pilot, prospective, randomised single-blind clinical trial.  Acta Anaesthesiologica Scandinavica 2020 Nov | To examine the effects of 2 different anaesthetic techniques on the serum expression of NETs formation in women undergoing breast cancer surgery. | RCT,  undergoing breast cancer surgery of curative intent  n=40 | Women were randomly assigned to receive one of 2 anaesthetic techniques: General anaesthesia or propofol general anaesthesia combined with paravertebral regional anaesthesia. Venous blood was taken pre and within 24 hours postoperatively.  MPO & citH3 concentrations were measured by enzyme-linked immunosorbent assay and represented NETs formation expression. | There was no difference in either postoperative MPO in GA vs PPA (10.5+6.6 vs 11.5+4.7 ng ml-1, p=0.60) or in postoperative citH3 in GA vs PPA (3.6+2.3 vs 4.0+5.9, p=0.80). | Strengths   - RCT design - Clear inclusion and exclusion criteria - Power calculation completed for sample size to detect a significant difference - 2 highly sensitive tests for NETs formation expression used - Recent, up to date research - Blinding of the scientist conducting translational work |
| Rayes R. et al [58]  Primary tumours induce neutrophil extracellular traps with targetable metastasis-promoting effects.  JCI insight, 2019 | To investigate whether elevated NETs levels are seen in high-mortality associated malignancies & that the level of NETs formation is associated with disease stage. | Observational cohort study  Patients with lung or upper GI adenocarcinoma who had not previously received treatment (n=60) & a healthy control group (n=15) | Serum was collected from patients and analysed. MPO concentrations were measured by enzyme-linked immunosorbent assay. | Elevated NETs expression in cancer patients compared to the healthy control group (p=0.03). Elevated NETs levels in patients with advanced upper GI and lung cancer, compared with patients with less advanced cancer (p=0.01) | Strengths   - Recent, up to date research - Blinding of the scientist conducting translational work   Limitations   - Only 1 biomarker for NETs used - Failure to outline clear inclusion, exclusion criteria |
| Richardson JJR et al [21]  Neutrophil Extracellular Trap Production in Patients with Colorectal Cancer In Vitro.  International Journal of Inflammation, 2017 | To investigate NETs expression in colorectal cancer patients compared to healthy controls. | Observational cohort study  Patients with colorectal cancer (n=45) & control group of healthy, well-matched volunteers (n=20) | Neutrophils were isolated from a venous blood sample from both cohorts and were then analysed under different stimuli (no stimulant, IL-8, LPS). Cancer characteristics & patient outcomes were compared to their respective NETs levels. NETs expression was measured via fluorescent microscopy. | Serum of patients with colorectal cancer showed increased NETs expression compared to healthy controls in response to no stimulus (9,735 AFU versus 11347 AFU, *p* = 0.0209), IL-8 (8,644 AFU versus 11,915 AFU, *p* = 0.0032), and LPS (10,576 AFU versus 12,473 AFU, *p* = 0.0428). Increased NETs expression was seen in patients who developed significant post-operative complications*** (11,760 AFU versus 18,340 AFU, *p* = 0.0242) and who had a prolonged hospital recovery (9,008 AFU versus 12,530 AFU, *p* = 0.0476). | Strengths   - Several stimulants tested for NETs expression increases the sensitivity of tests - Sample size - Blinding of the scientist conducting translational work |
| Park J et al [37]  Cancer cells induce metastasis-supporting neutrophil extracellular DNA traps.  Science Translational Medicine, 2016 | To assess whether breast cancer cell-induced NETs formation promotes the invasion and formation of metastatic lung disease in vitro & in vivo models. | Observational Study  Murine Models  N=8 mice  Cell samples of human primary breast cancer & metastatic lung cancer.  N=20 | Murine 4T1 (metastatic tumour) and 4T07 (non-metastatic tumour) breast cancer cells were transplanted into murine models (n=4 in each). Neutrophils were measured using Ly6G immunostaining.  MPO & citH3 concentrations were measured by enzyme-linked immunosorbent assay and represented NETs expression.  Immunofluorescence staining of the primary breast tumour and the metastatic lung lesions was performed and analysed, to  measure metastasis. | An increased number of neutrophils were expressed in the 4T1 metastatic tumour compared to the non-metastatic 4T07 tumour (p=0.0009). NETs formation was found to be present in 16/20 of the primary tumours and in 13/19 metastatic lung lesions. | Strengths   - 2 biomarkers to detect NETs used, increased sensitivity - Blinding of the scientist conducting translational work   Limitations   - Failure to outline clear inclusion, exclusion criteria |
| Thålin, C et al [57]  NETosis promotes cancer-associated arterial micro thrombosis presenting as ischemic stroke with troponin elevation.  Thrombosis Research, 2016 | To observe whether the myocardial and cerebral thrombosis were the result of a cancer-associated NETs induced hypercoagulable state. | A prospective, observational case-control study  patients presenting with an ischaemic stroke, who subsequently died  n=31 | Patients were analysed according to those with a large serum elevation of high sensitive Troponin T (hsTnT- elevated levels associated with malignancy) (n=12), and those who had normal levels (n=19). Autopsies were completed and showed widespread micro thrombosis containing citH3, a biomarker for NETs. | Increased serum NETs in patients with elevated hsTnT compared to patients with normal levels (p<0.001). CitH3 level was also correlated with the thrombin-antithrombin complex (p=0.004) and soluble P-selectin (p<0.001). | Strengths   - Blinding of the scientist conducting translational work   Limitations   - Failure to outline clear inclusion, exclusion criteria |
| Jung H. et al [25]  Cancer cell-induced neutrophil extracellular traps promote both hypercoagulability and cancer progression.  PLOS One, 2019 | To investigate cancer-induced NETs formation & whether NETs expression promotes thrombus formation and cancer progression | Observational cohort study  Patients with pancreatobiliary malignancy (n=62) & healthy control (n=30) | Peripheral blood sample was taken from participants. Neutrophils were isolated and analysed. Histone- DNA complex detected by ELISA measured NETs expression. To measure coagulability, ETP was measured using thrombin assay and hypercoagulability markers were measured with a Zymuphen MP-Activity kit. | There was increased NETs expression in the cancer cohort compared to healthy controls (*P* < 0.05). Similarly, there was significantly increased ETP & hypercoagulability markers in the cancer patient cohort. (P<0.05) | Strengths   - Recent, up to date research - Blinding of the scientist conducting translational work   Limitations   - Failure to outline clear inclusion, exclusion criteria |
| Hisada, Y et al [29]  Neutrophils and neutrophil extracellular traps enhance venous thrombosis in mice bearing human pancreatic tumours.  Haematologica, 2019 | To investigate the levels of NETs in mice bearing pancreatic cancer & the contribution of NETs formation to venous thrombosis. | Observational cohort study  Mice injected with Human pancreatic cancer cell line BxPc-3 and a control cohort of mice (n= 9 to 20 mice in each cohort) | Human pancreatic cancer cell line BxPc-3 and grown in the pancreas of male mice. CitH3 was used to detect NETs expression. Thrombus formation was induced by IVC stasis in both cohorts. CitH3 and Ly6G (neutrophil marker) levels, Immunofluorescence and electron microscopy were used to detect contents of thrombi. | Increased NETs levels were seen in tumour bearing mice compared to control cohort (P<0.05). Thrombi from tumour bearing mice had higher NETs and neutrophil contents compared to control group (P<0.05). | Strengths   - 2 biomarkers used for NETs detection, increase sensitivity - Blinding of the scientist conducting translational work   Limitations   - Failure to outline clear inclusion, exclusion criteria |
| Tohme, S et al [24]  Neutrophil extracellular traps promote the development and progression of liver metastases after surgical stress  HPB, 2017 | To determine whether NETs expression plays a role in tumour metastasis & development in a murine model of surgical stress which was induced by liver ischemia-reperfusion. | Observational cohort study  Patients who underwent: major hepatectomy (35), smaller hepatectomy (15), healthy control group (20)  Total: n=70  2 even cohorts of murine models with MC38 induced colon cancer | Serum was taken day 1 post-op for patients who underwent hepatectomy for metastatic colorectal cancer. NETs expression measured by detecting MPO-DNA complexes using ELISA.  One cohort of mice was subjected to surgical stress by liver ischaemia for 60 minutes before reperfusion, the other cohort did not undergo I/R. A splenectomy was performed and analysed for NETs expression using ELISA to detect CitH3. | Patients with elevated NETs levels postoperatively were 4 times less likely to have a disease-free survival* compared to the cohorts with lower NETs expression (95%CI: 1.39-12.81, p=0.01).  Mice subjected to liver I/R showed greater hepatic metastases compared with mice who were not exposed to hepatic I/R | Strengths   - Blinding of the scientist conducting translational work - Sample size   Limitations   - Failure to outline clear inclusion, exclusion criteria |
| Arpinati, L et al [88]  NETosis in cancer: a critical analysis of the impact of cancer on neutrophil extracellular trap (NET) release in lung cancer patients vs. mice.  Cancer Immunology, Immunotherapy, 2020 | To investigate the predisposition of isolated neutrophils to undergo NETs expression in the presence of lung cancer, comparing human patients with two mouse models. | Observational cohort study  Isolated neutrophils from healthy patients (n=9), patients with LLC (n=9) and mice injected with LLC cell cultures and a control mice cohort  Total n=18 | Neutrophils were isolated from cancer patients and healthy donors and the extent of NETs release was measured by microscopic detected of stained anti citH3 and anti-MPO antibodies. Spontaneous neutrophil NETs expression and PMA-induced NETs expression activation was measured. Neutrophils were isolated from the serum of cancer-induced mice and control mice and analysed in the same manner. | Neutrophils from cancer patients and healthy donors displayed similar amounts of spontaneous NETs (9.3 ± 1.29% and 8.7 ± 0.79% respectively) and similar amounts of PMA induced NETs (33.5 ± 2.31% and 40.2 ± 2.73% respectively). NETs activation in both mice cohorts was much lower overall, but LLC bearing mice had significantly higher spontaneous NETs activity compared to controls (3.67 ± 0.21% and 0.64 ± 0.26%  respectively) and under PMA induced NETs (4.17 ± 0.29%  2.2 ± 0.22%, respectively). These results show differences in NETs activation in LLC bearing humans and mice and these differences should be taken into consideration during future investigations. | Strengths   - Recent research - 2 biomarkers used for NETs detection, increase sensitivity - Blinding of the scientist conducting translational work   Limitations   - low population size and no power calculation to show a significant change - Failure to outline clear inclusion, exclusion criteria |
